# Supplementary material
Source: PubMed Central journal article supplement (PMC4206217)

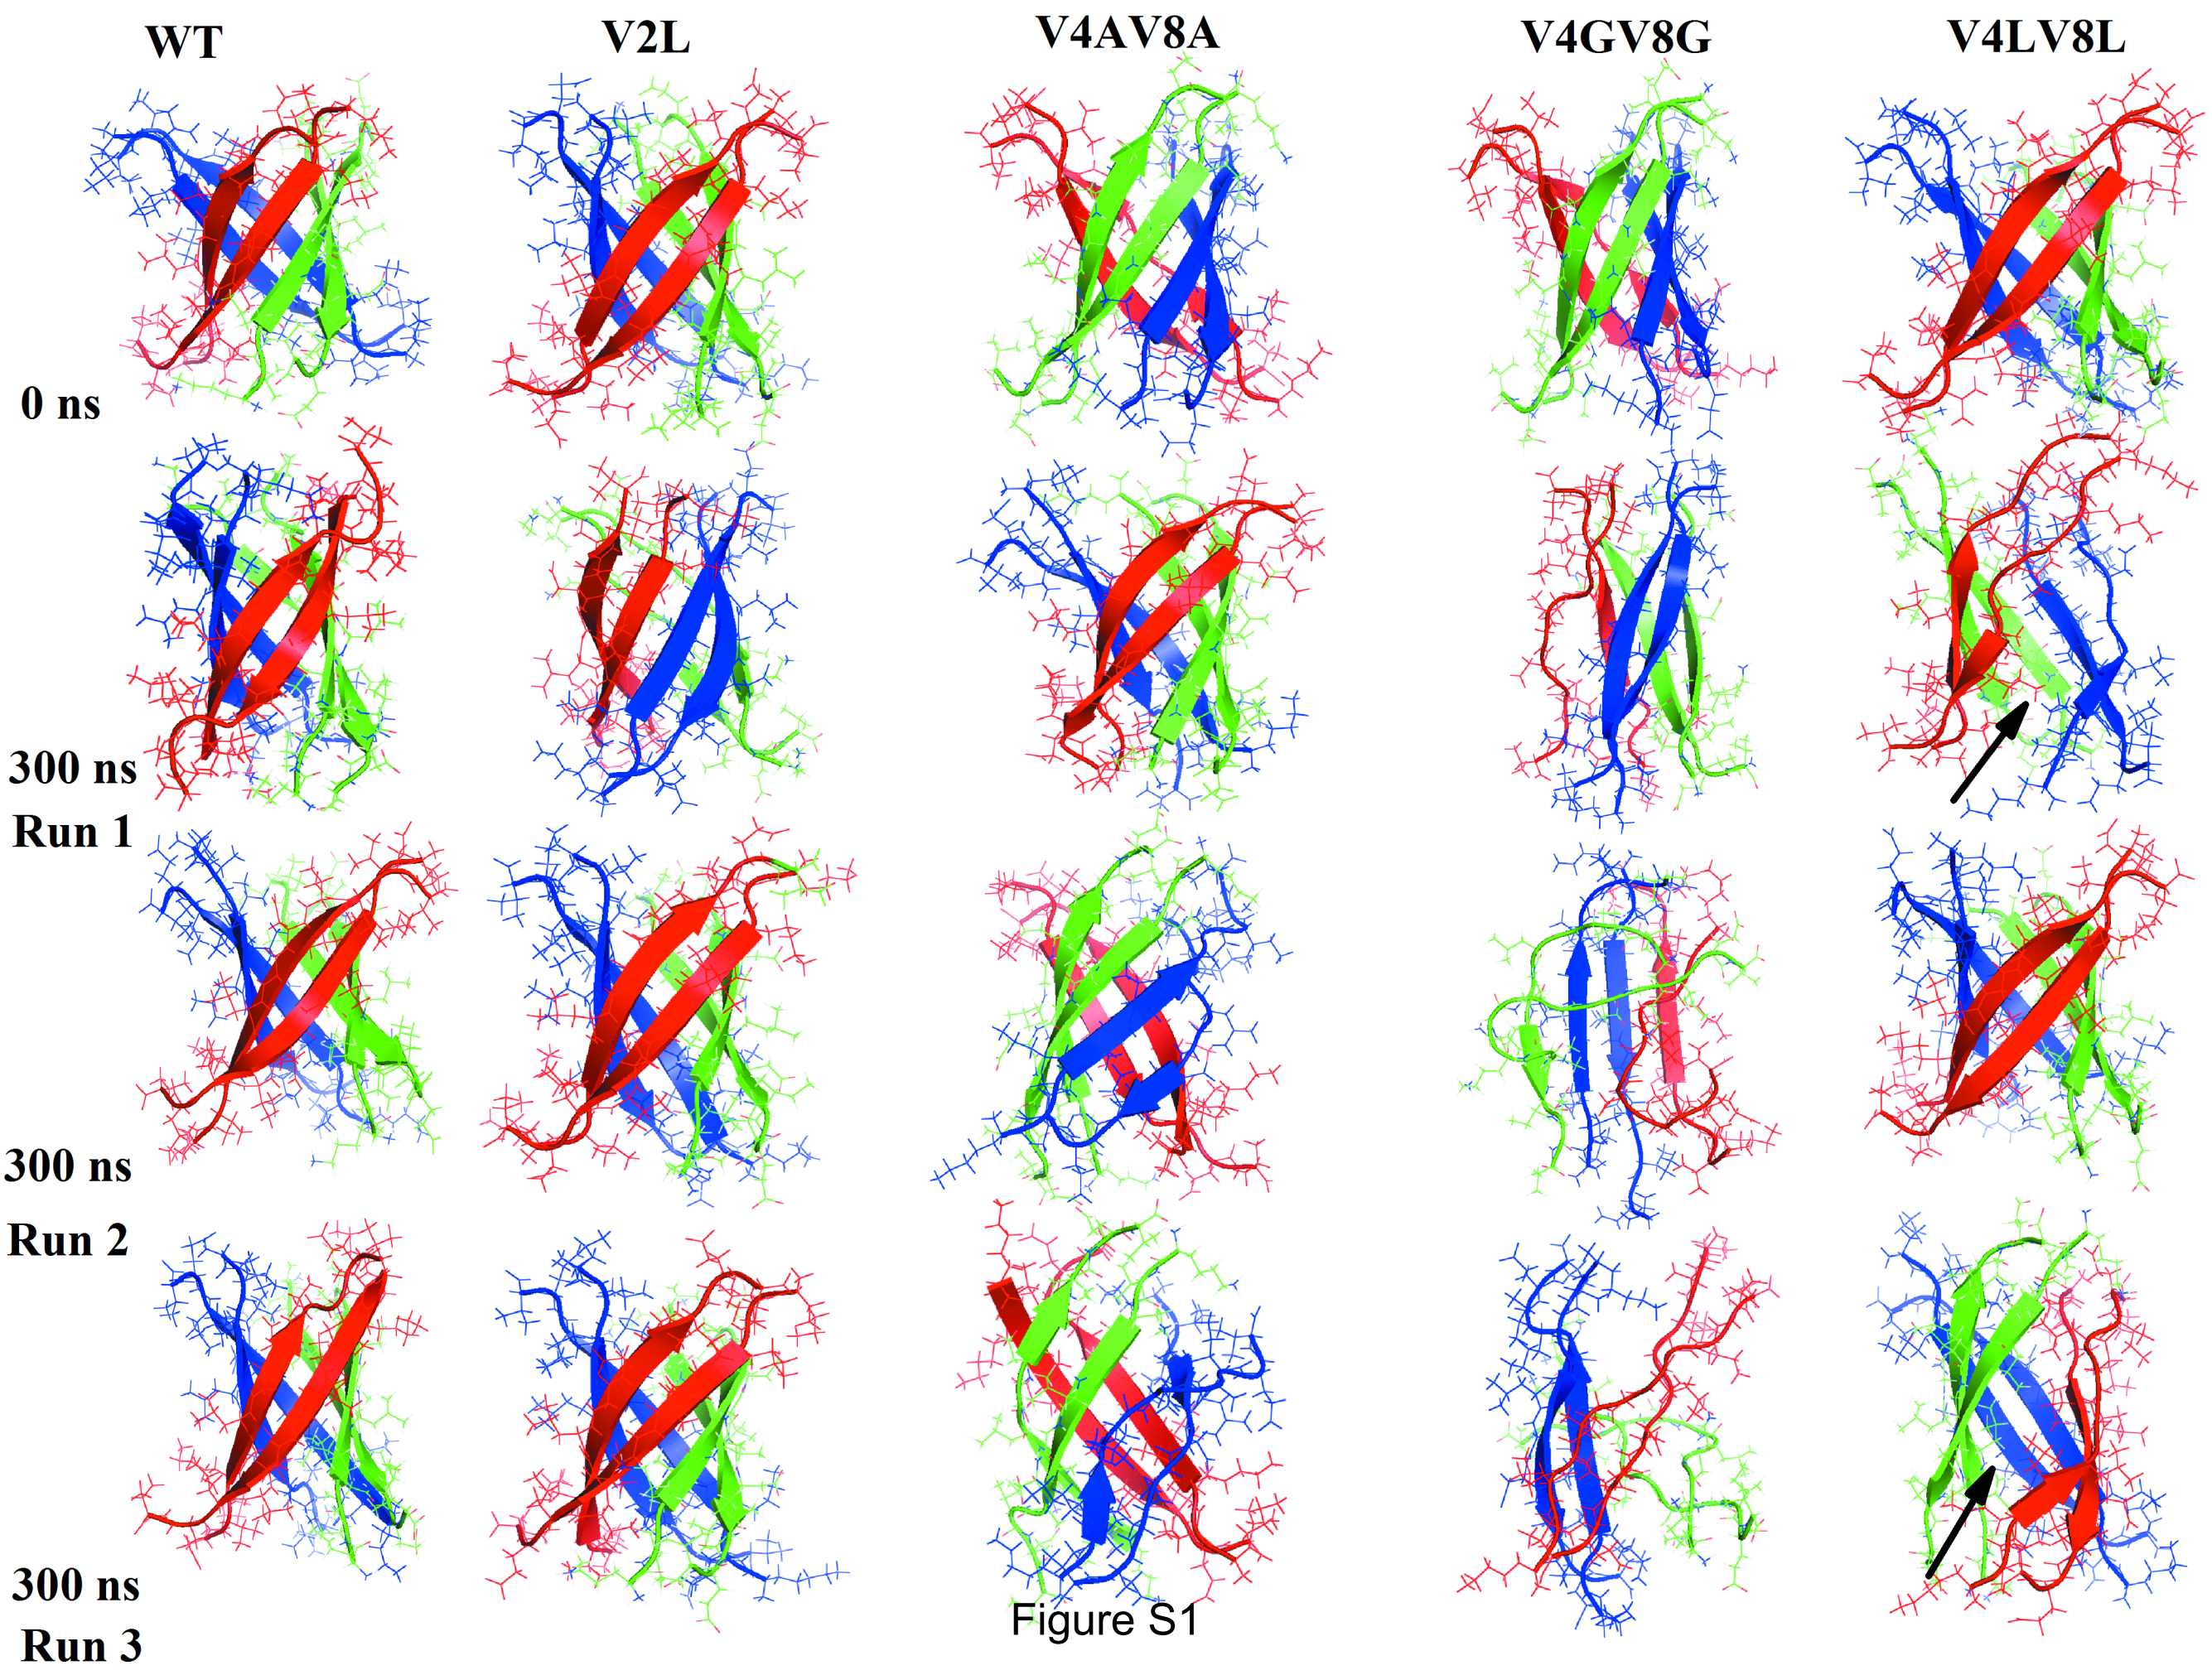

Supplement: NIHMS635210-supplement-Supplemental_Figure_1.pdf [file NIHMS635210-supplement-Supplemental_Figure_1.pdf]

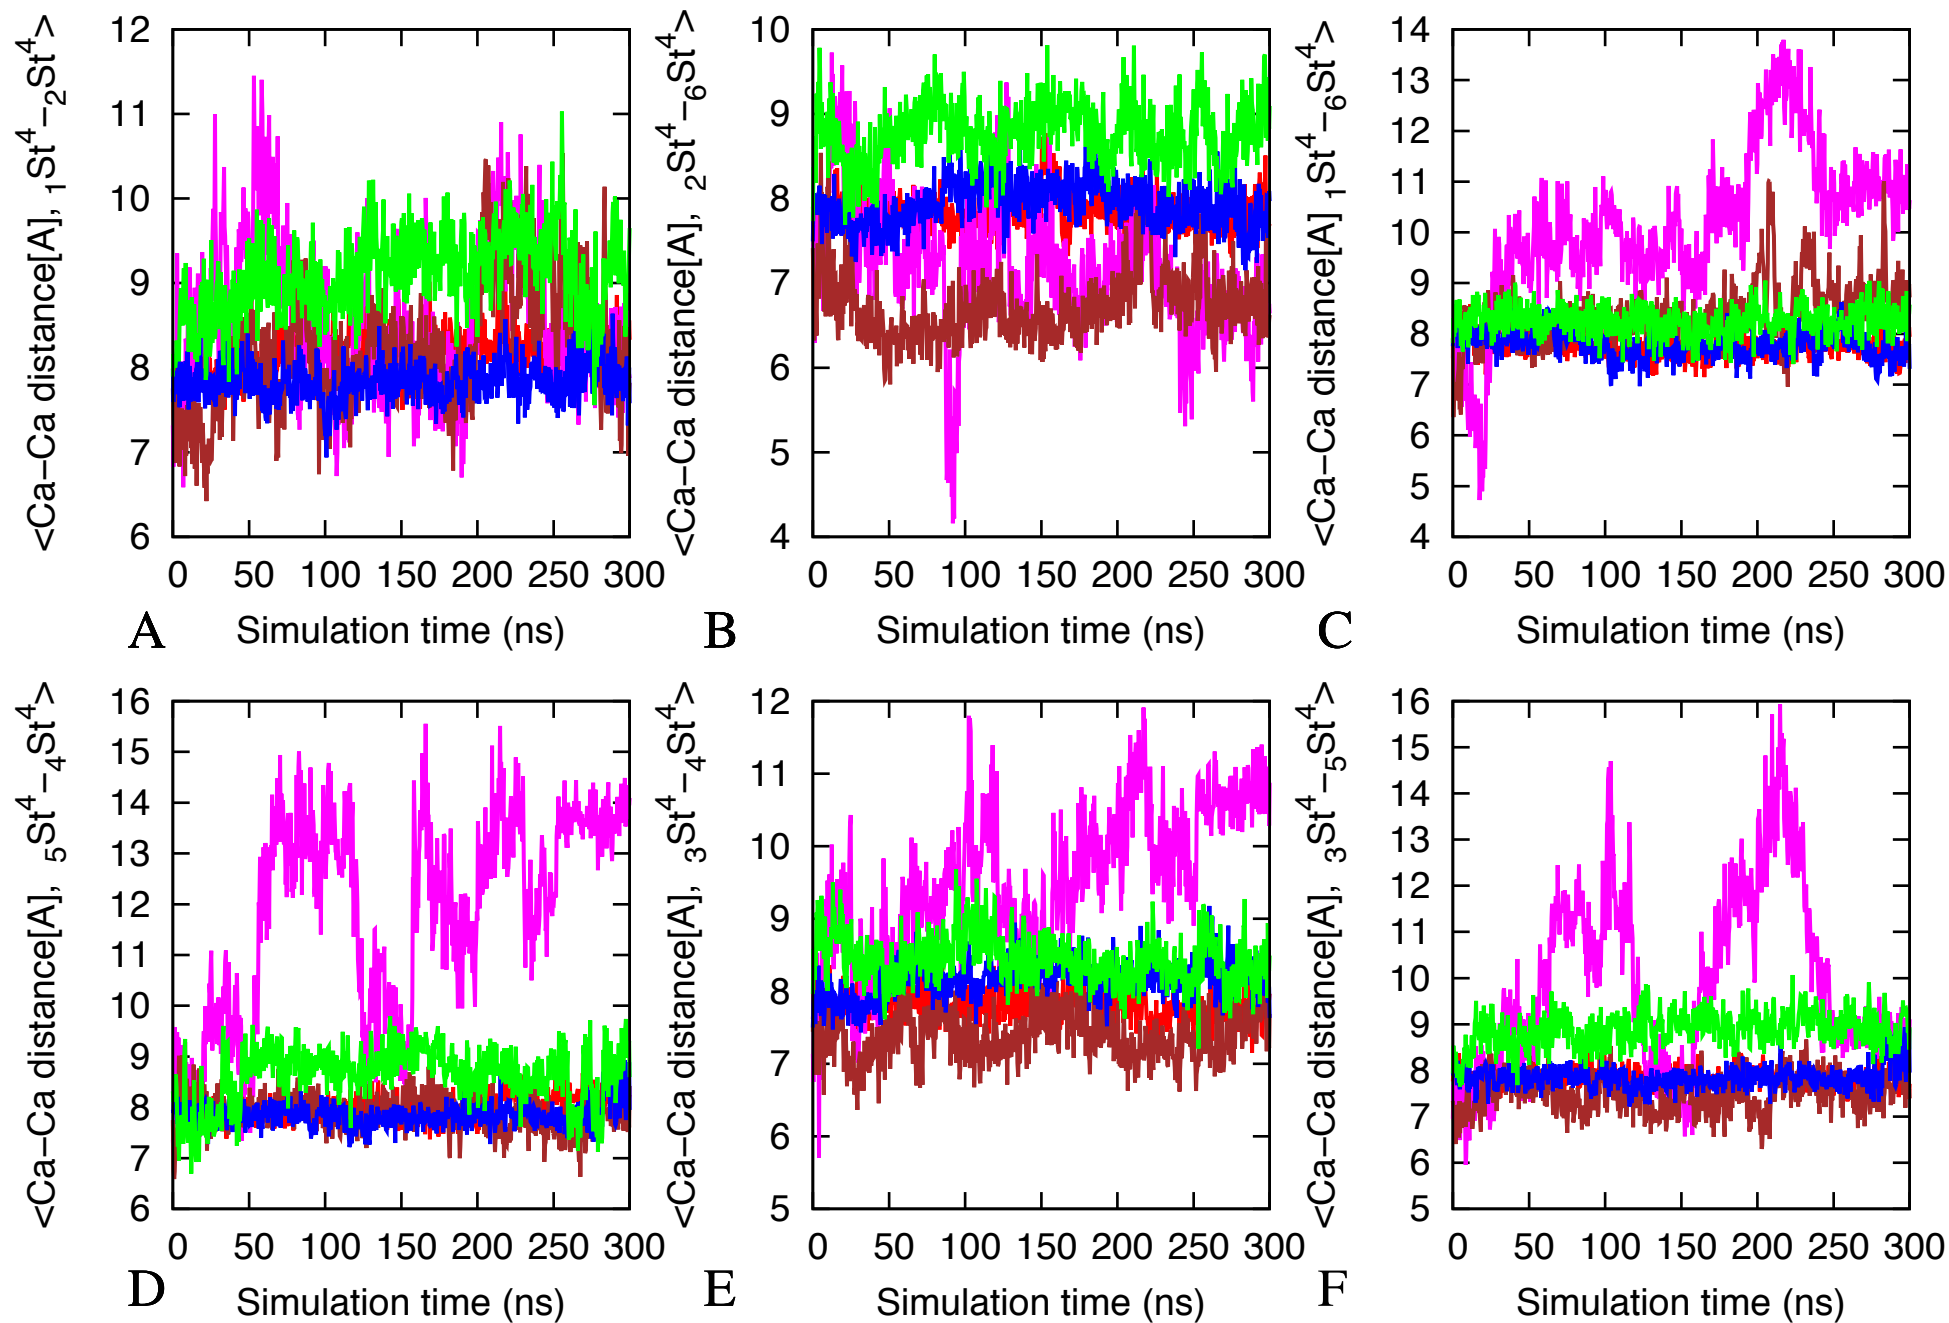

Figure S2

Supplement: NIHMS635210-supplement-Supplemental_Figure_2.pdf [file NIHMS635210-supplement-Supplemental_Figure_2.pdf]

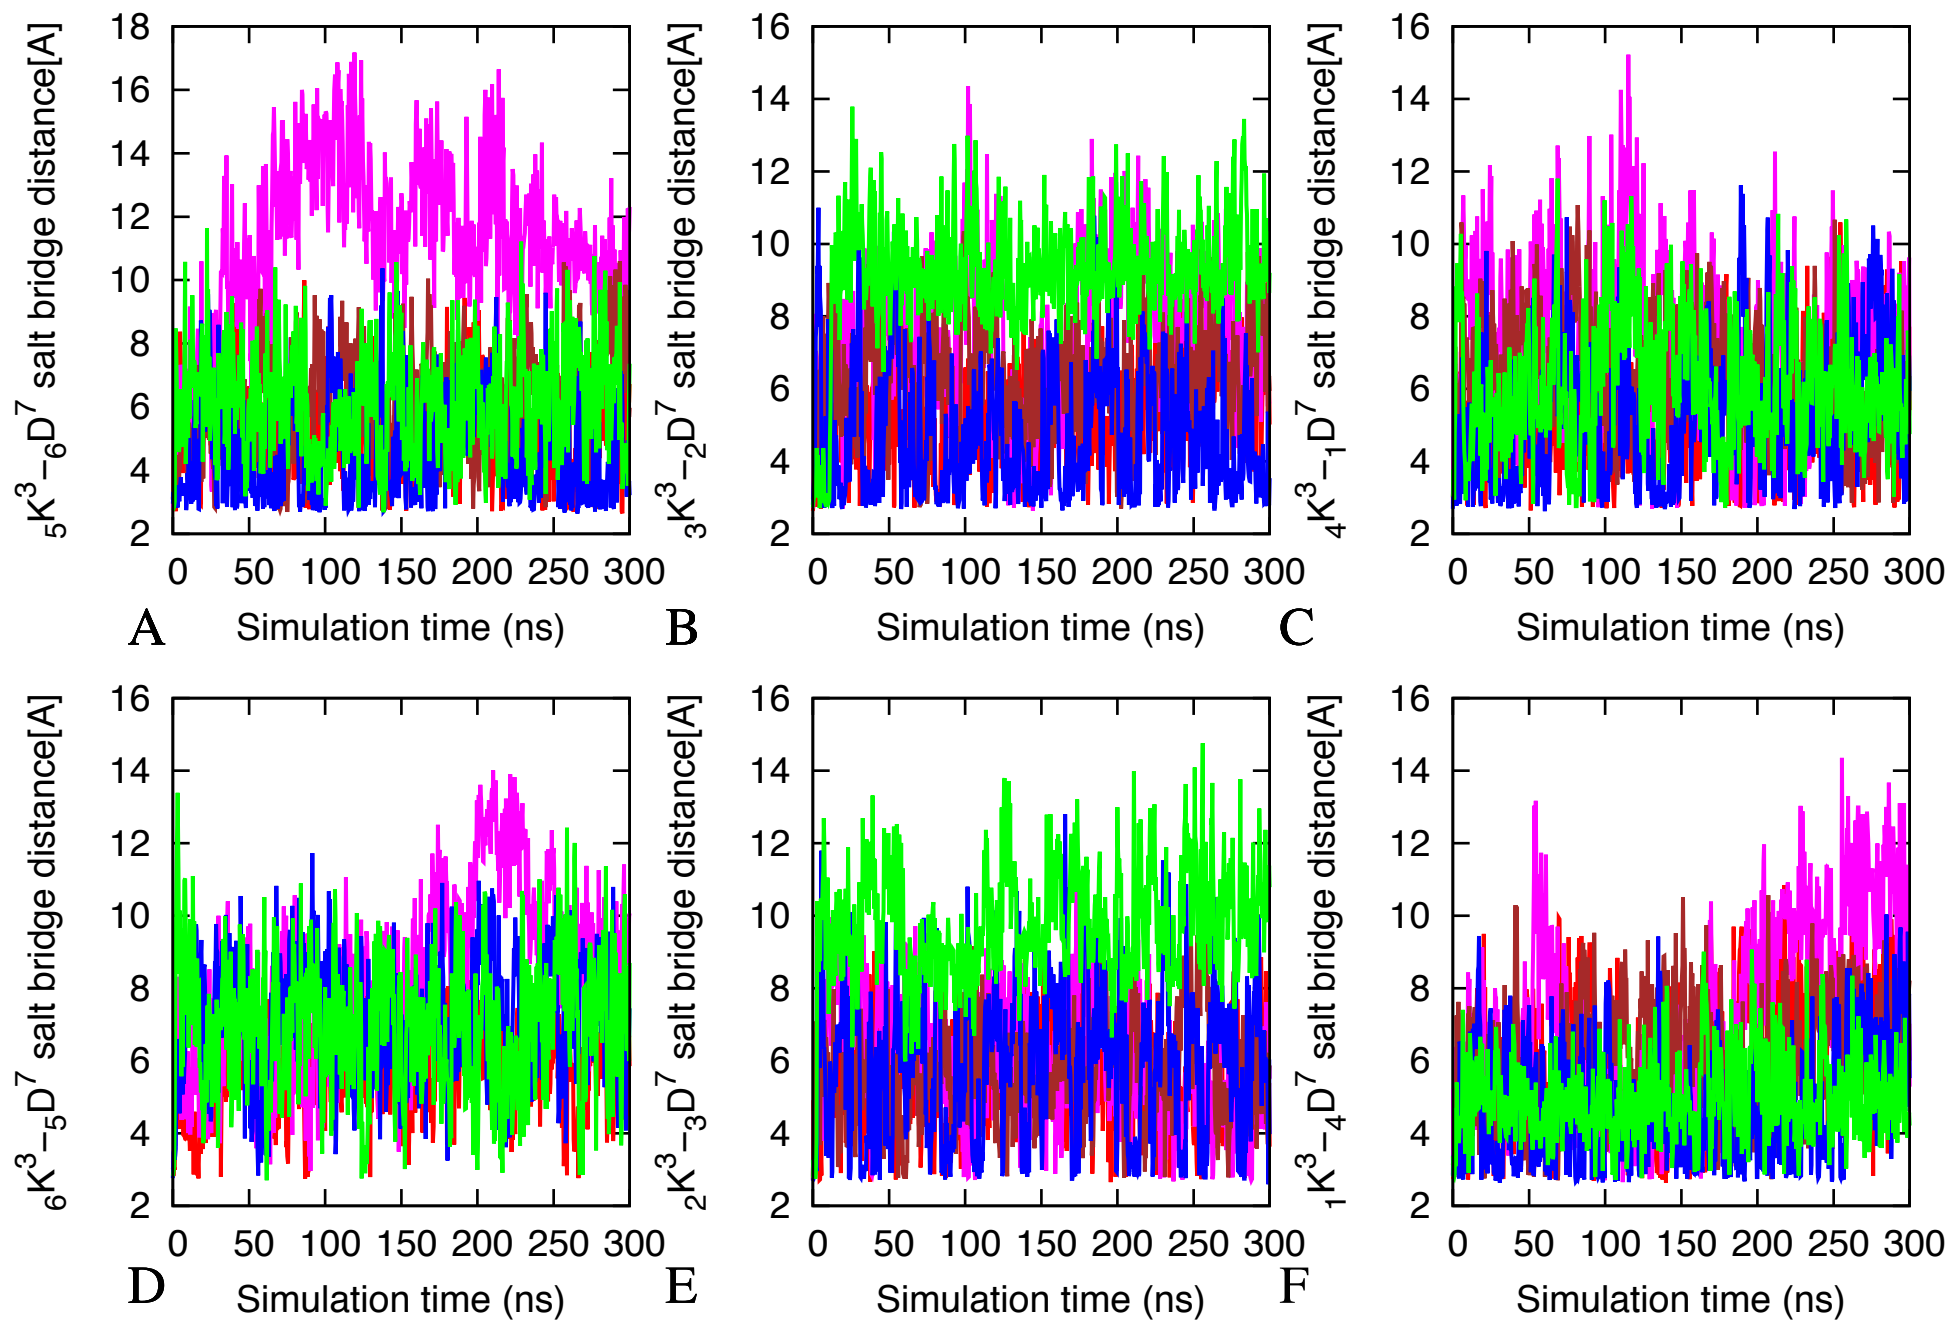

Figure S3

Supplement: NIHMS635210-supplement-Supplemental_Figure_3.pdf [file NIHMS635210-supplement-Supplemental_Figure_3.pdf]
